# Supplementary material for: Evaluation of Carbapenem Use Before and After Implementation of an Antimicrobial Stewardship-Led Carbapenem-Sparing Strategy in a Lebanese Tertiary Hospital: A Retrospective Study
Source: PubMed Central journal article supplement (PMC8990088; doi:10.3389/fcimb.2022.729491), 2022-03-25
Supplement: DataSheet_1.pdf [file DataSheet_1.pdf]

# Empiric Carbapenem Therapy Algorithm

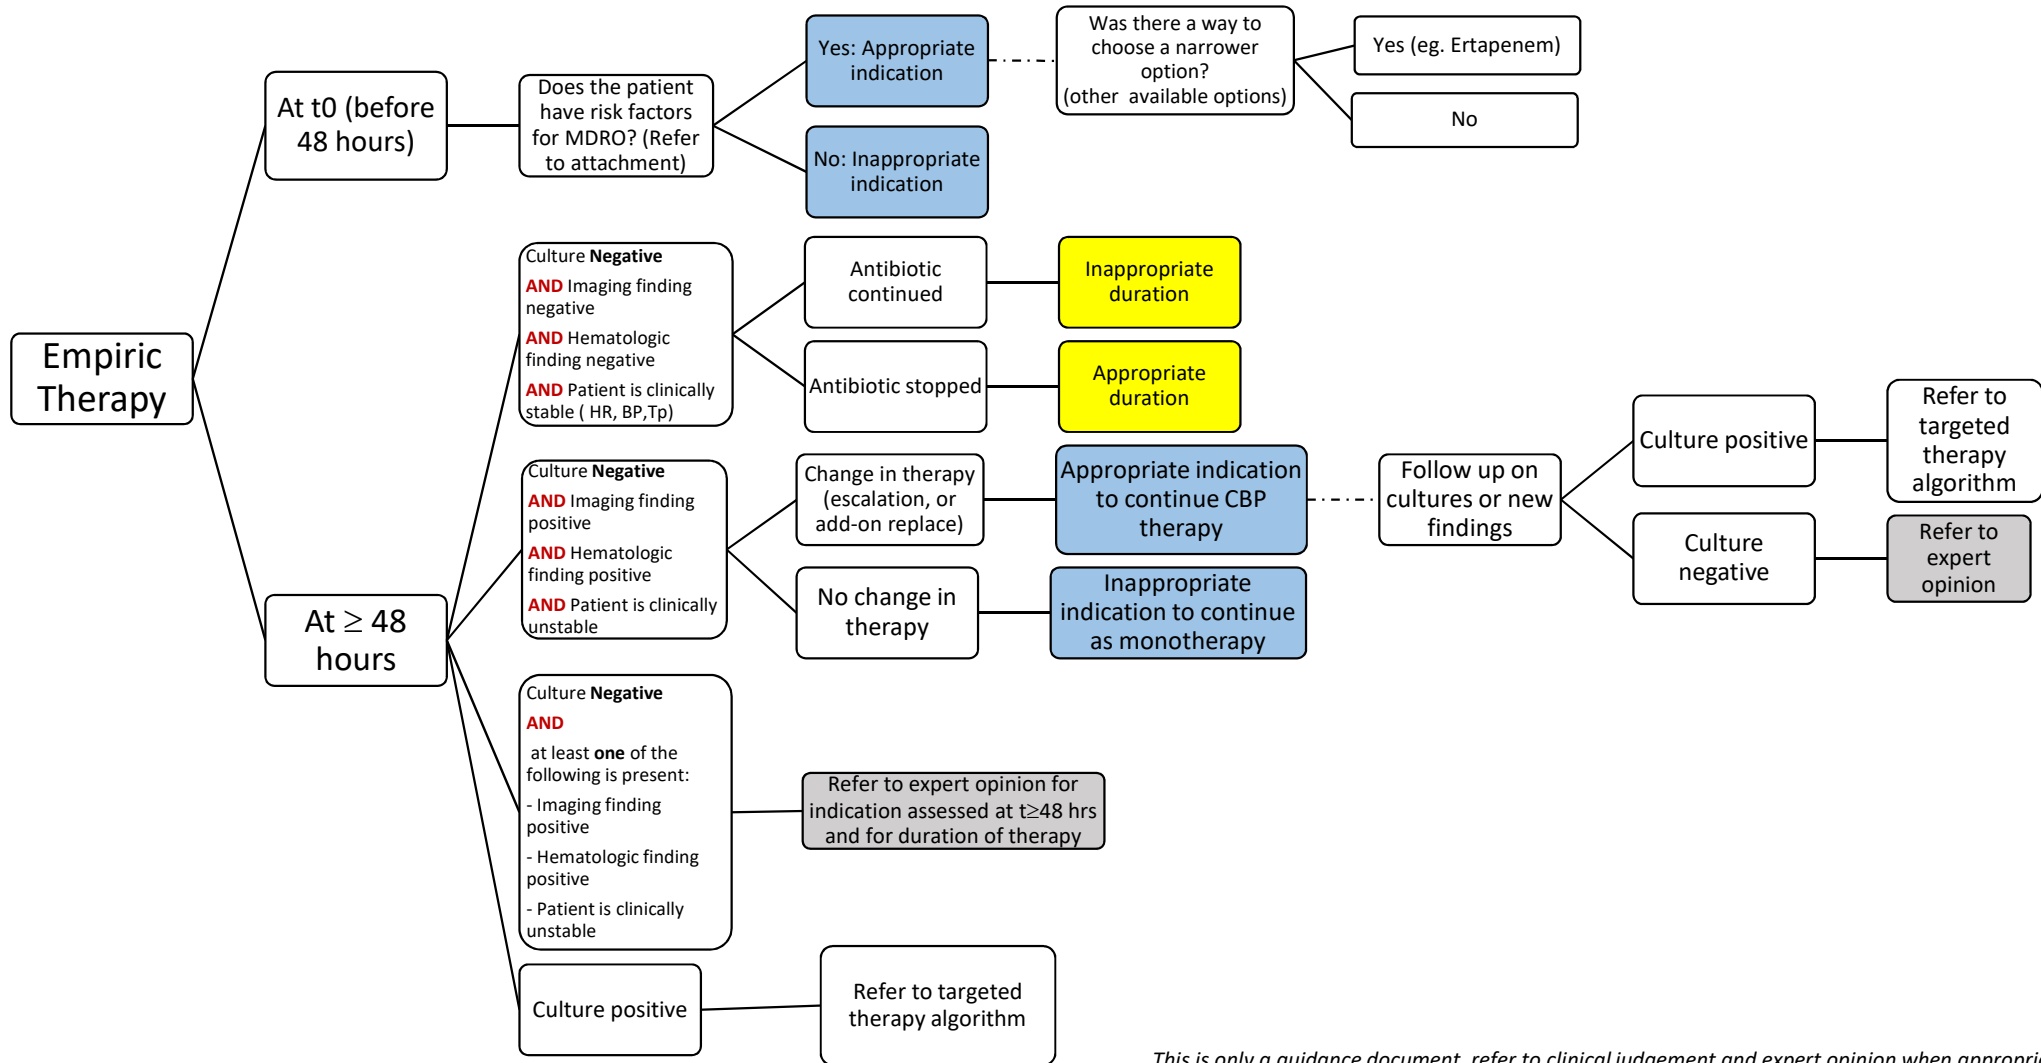

*This is only a guidance document, refer to clinical judgement and expert opinion when appropriate*

# Targeted Carbapenem Therapy Algorithm (Positive Culture)

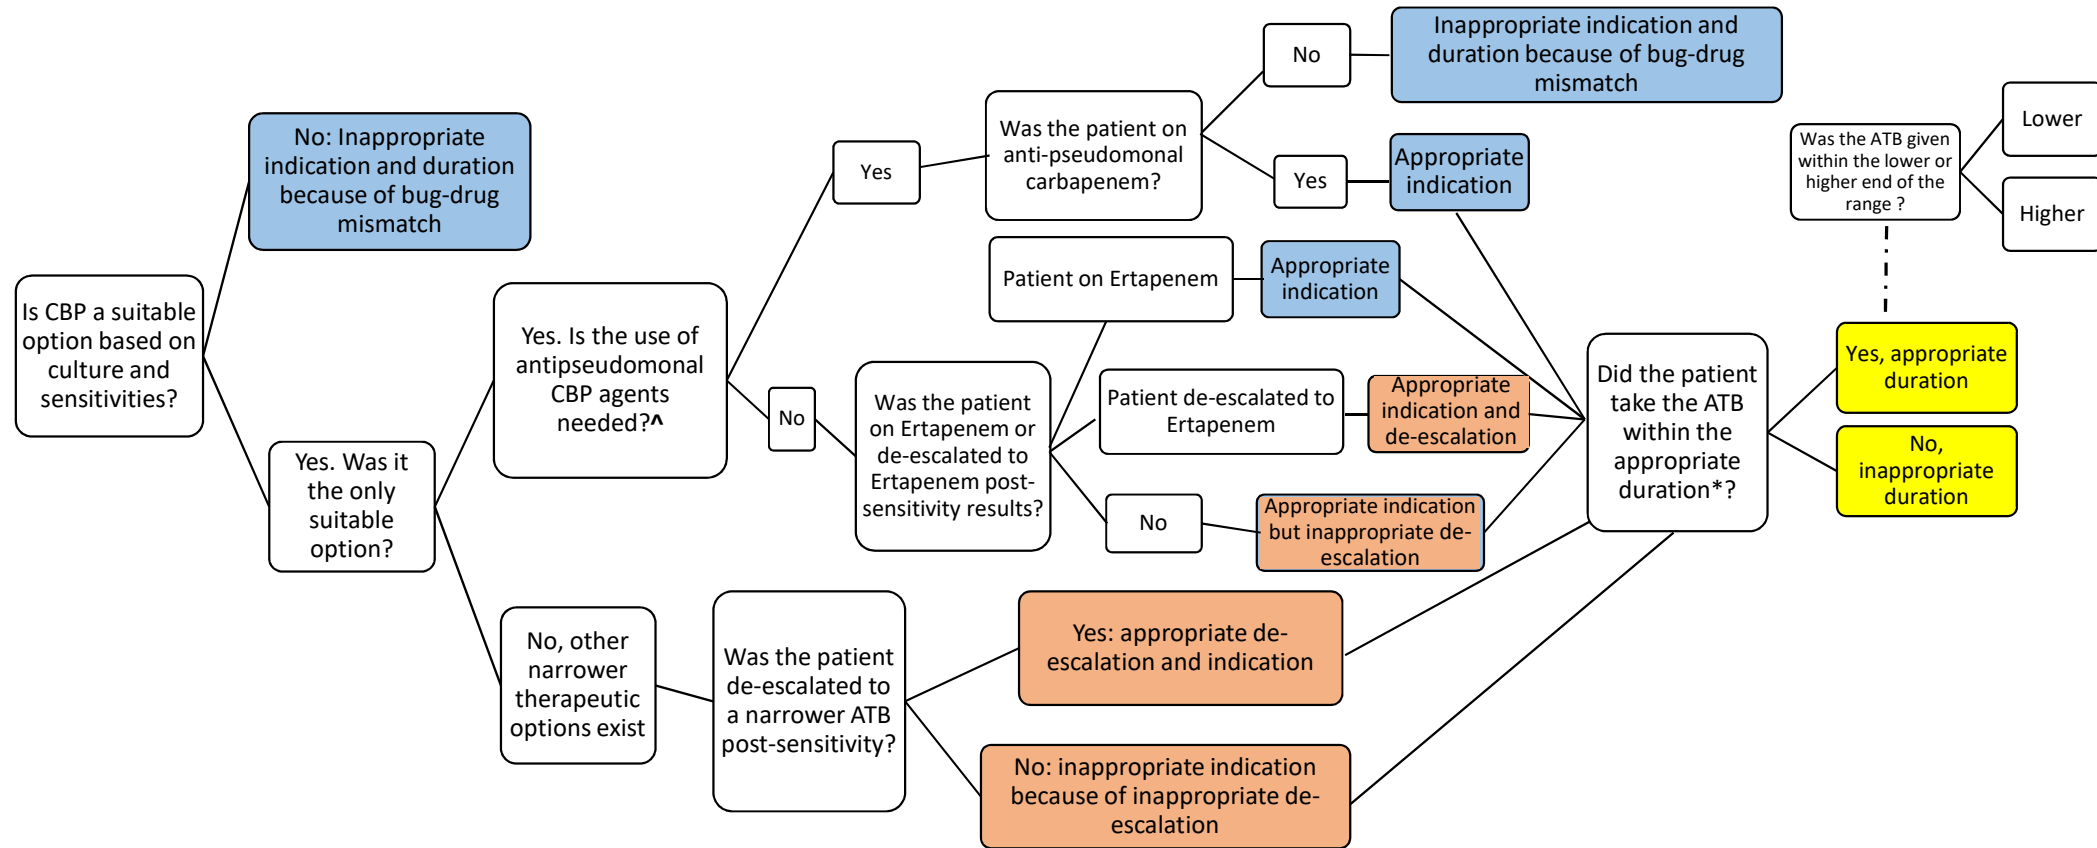

\*: A duration is considered to be appropriate when it is between the recommended range including the lower and higher end of the range

^: Antipseudomonal agents (Meropenem/Imipenem-cilastatin) are indicated if the culture is positive for pseudomonas or those are the agents recommended for a specific indication

*This is only a guidance document, refer to clinical judgement and expert opinion when appropriate*

# Surgical Prophylaxis Carbapenem Algorithm

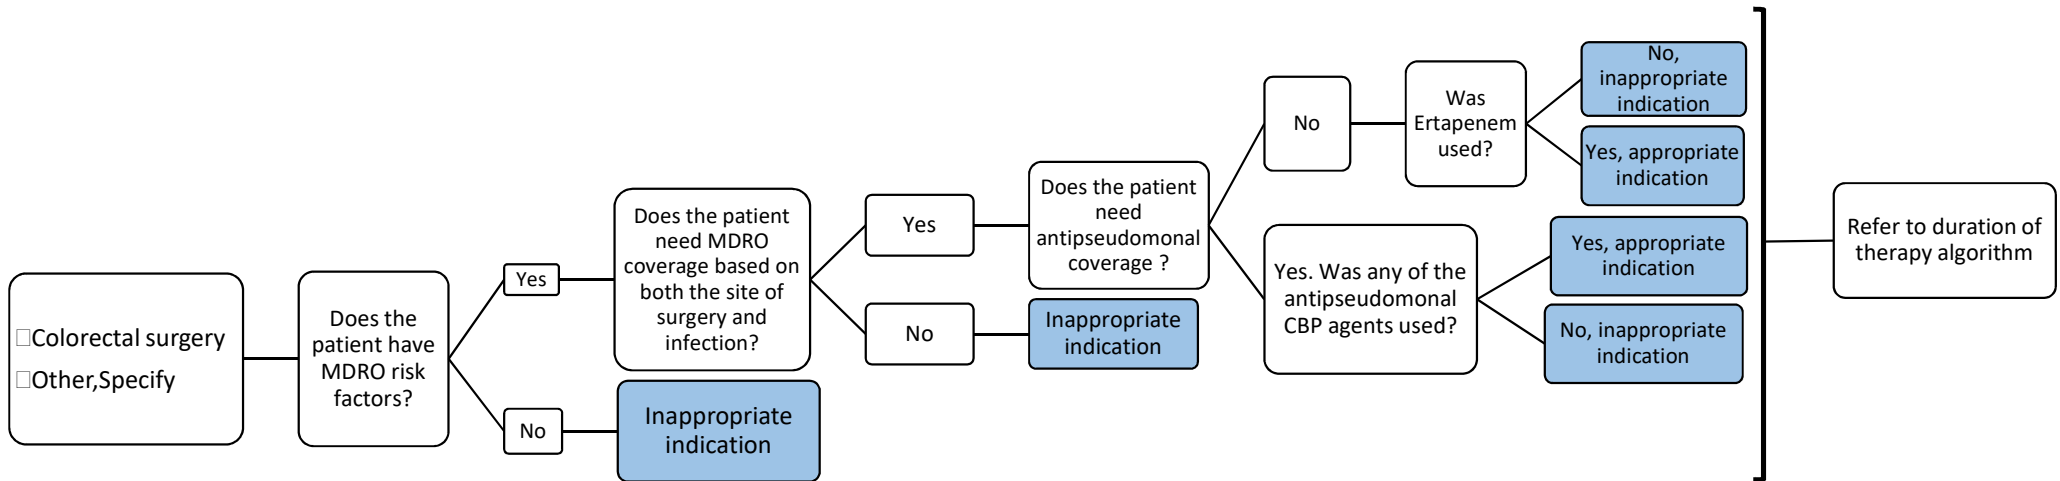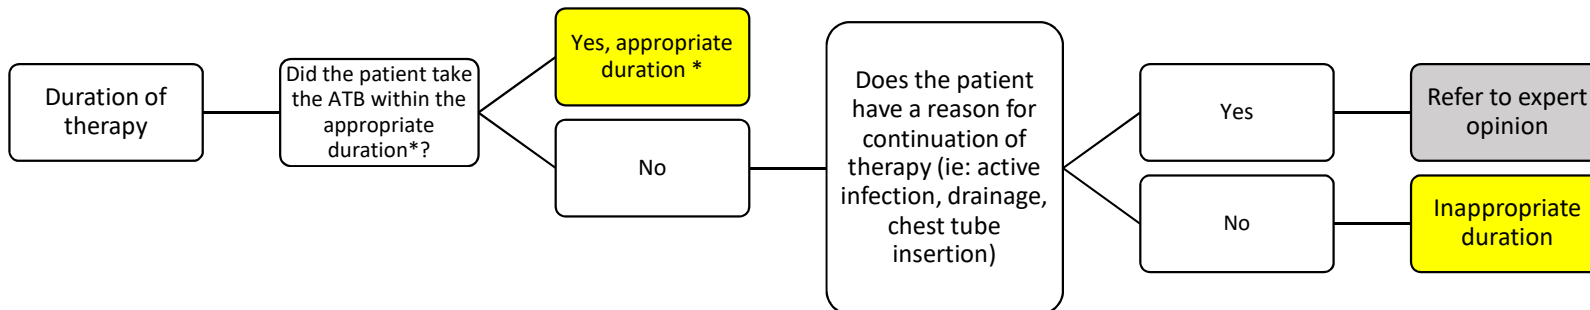

\*: A duration is considered to be appropriate if the antibiotic was stopped 48 hours after a cardiovascular surgery or after 24 hours for all other surgeries.

*This is only a guidance document, refer to clinical judgement and expert opinion when appropriate*
