# Supplementary material for: Evaluation of Carbapenem Use Before and After Implementation of an Antimicrobial Stewardship-Led Carbapenem-Sparing Strategy in a Lebanese Tertiary Hospital: A Retrospective Study
Source: PubMed Central journal article supplement (PMC8990088; doi:10.3389/fcimb.2022.729491), 2022-03-25
Supplement: DataSheet_2.pdf [file DataSheet_2.pdf]

**MDRO Risk Factors based on indication**

| <b>Community Acquired Pneumonia: Pseudomonas risk factors</b>                              | <input type="checkbox"/> Bronchiectasis Structural lung disease (chronic bronchitis, COPD, emphysema, interstitial lung disease, pulmonary fibrosis) AND taking chronic steroids/ history of repeated antimicrobial use<br><input type="checkbox"/> Chronic systemic steroids<br><input type="checkbox"/> Repeated antimicrobial use                                                                                                                                                                                                                                                                                                                                                                                                                                                                                                                                                        |                 |       |                                                                     |   |                                                   |   |                                                       |   |                                                                                      |   |                                            |   |                                                      |   |                   |   |               |   |
|--------------------------------------------------------------------------------------------|---------------------------------------------------------------------------------------------------------------------------------------------------------------------------------------------------------------------------------------------------------------------------------------------------------------------------------------------------------------------------------------------------------------------------------------------------------------------------------------------------------------------------------------------------------------------------------------------------------------------------------------------------------------------------------------------------------------------------------------------------------------------------------------------------------------------------------------------------------------------------------------------|-----------------|-------|---------------------------------------------------------------------|---|---------------------------------------------------|---|-------------------------------------------------------|---|--------------------------------------------------------------------------------------|---|--------------------------------------------|---|------------------------------------------------------|---|-------------------|---|---------------|---|
| <b>HAP/VAP: MDRO risk factors</b>                                                          | <input type="checkbox"/> Late onset—occurs after $\geq 5$ days of hospitalization<br><input type="checkbox"/> Antimicrobial therapy within the last 90 days (consider broad spectrum, multiple courses, etc.)<br><input type="checkbox"/> Immunosuppressive disease and/or therapy<br><input type="checkbox"/> History of infection or colonization with a multidrug resistant organism<br><input type="checkbox"/> Chronic dialysis within 30 days                                                                                                                                                                                                                                                                                                                                                                                                                                         |                 |       |                                                                     |   |                                                   |   |                                                       |   |                                                                                      |   |                                            |   |                                                      |   |                   |   |               |   |
| <b>VAP: MDRO risk factors</b>                                                              | <input type="checkbox"/> Antimicrobial therapy within the last 90 days (consider broad spectrum, multiple courses, etc.)<br><input type="checkbox"/> Septic shock at the time of VAP<br><input type="checkbox"/> ARDS preceding VAP<br><input type="checkbox"/> 5 or more days prior to the occurrence of hospitalization<br><input type="checkbox"/> Acute renal replacement therapy before VAP                                                                                                                                                                                                                                                                                                                                                                                                                                                                                            |                 |       |                                                                     |   |                                                   |   |                                                       |   |                                                                                      |   |                                            |   |                                                      |   |                   |   |               |   |
| <b>Catheter related blood-streaminfection:Pseudomonas Risk factors:</b>                    | <input type="checkbox"/> Neutropenic<br><input type="checkbox"/> septic patients<br><input type="checkbox"/> Previously colonized with Pseudomonas Aeruginosa                                                                                                                                                                                                                                                                                                                                                                                                                                                                                                                                                                                                                                                                                                                               |                 |       |                                                                     |   |                                                   |   |                                                       |   |                                                                                      |   |                                            |   |                                                      |   |                   |   |               |   |
| <b>Febrile Neutropenia: Antipseudomonal beta-lactam monotherapy( including carbapenem)</b> | <input type="checkbox"/> MASCC score (<21) High risk patients<br>Criteria below: <table border="1" data-bbox="509 890 1172 1331"> <thead> <tr> <th>Characteristics</th> <th>Score</th> </tr> </thead> <tbody> <tr> <td>Burden of febrile neutropenia with no or mild symptoms<sup>a</sup></td> <td>5</td> </tr> <tr> <td>No hypotension (systolic blood pressure &gt;90 mmHg)</td> <td>5</td> </tr> <tr> <td>No chronic obstructive pulmonary disease<sup>b</sup></td> <td>4</td> </tr> <tr> <td>Solid tumor or hematologic malignancy with no previous fungal infection<sup>c</sup></td> <td>4</td> </tr> <tr> <td>No dehydration requiring parenteral fluids</td> <td>3</td> </tr> <tr> <td>Burden of febrile neutropenia with moderate symptoms</td> <td>3</td> </tr> <tr> <td>Outpatient status</td> <td>3</td> </tr> <tr> <td>Age &lt;60 years</td> <td>2</td> </tr> </tbody> </table> | Characteristics | Score | Burden of febrile neutropenia with no or mild symptoms <sup>a</sup> | 5 | No hypotension (systolic blood pressure >90 mmHg) | 5 | No chronic obstructive pulmonary disease <sup>b</sup> | 4 | Solid tumor or hematologic malignancy with no previous fungal infection <sup>c</sup> | 4 | No dehydration requiring parenteral fluids | 3 | Burden of febrile neutropenia with moderate symptoms | 3 | Outpatient status | 3 | Age <60 years | 2 |
| Characteristics                                                                            | Score                                                                                                                                                                                                                                                                                                                                                                                                                                                                                                                                                                                                                                                                                                                                                                                                                                                                                       |                 |       |                                                                     |   |                                                   |   |                                                       |   |                                                                                      |   |                                            |   |                                                      |   |                   |   |               |   |
| Burden of febrile neutropenia with no or mild symptoms <sup>a</sup>                        | 5                                                                                                                                                                                                                                                                                                                                                                                                                                                                                                                                                                                                                                                                                                                                                                                                                                                                                           |                 |       |                                                                     |   |                                                   |   |                                                       |   |                                                                                      |   |                                            |   |                                                      |   |                   |   |               |   |
| No hypotension (systolic blood pressure >90 mmHg)                                          | 5                                                                                                                                                                                                                                                                                                                                                                                                                                                                                                                                                                                                                                                                                                                                                                                                                                                                                           |                 |       |                                                                     |   |                                                   |   |                                                       |   |                                                                                      |   |                                            |   |                                                      |   |                   |   |               |   |
| No chronic obstructive pulmonary disease <sup>b</sup>                                      | 4                                                                                                                                                                                                                                                                                                                                                                                                                                                                                                                                                                                                                                                                                                                                                                                                                                                                                           |                 |       |                                                                     |   |                                                   |   |                                                       |   |                                                                                      |   |                                            |   |                                                      |   |                   |   |               |   |
| Solid tumor or hematologic malignancy with no previous fungal infection <sup>c</sup>       | 4                                                                                                                                                                                                                                                                                                                                                                                                                                                                                                                                                                                                                                                                                                                                                                                                                                                                                           |                 |       |                                                                     |   |                                                   |   |                                                       |   |                                                                                      |   |                                            |   |                                                      |   |                   |   |               |   |
| No dehydration requiring parenteral fluids                                                 | 3                                                                                                                                                                                                                                                                                                                                                                                                                                                                                                                                                                                                                                                                                                                                                                                                                                                                                           |                 |       |                                                                     |   |                                                   |   |                                                       |   |                                                                                      |   |                                            |   |                                                      |   |                   |   |               |   |
| Burden of febrile neutropenia with moderate symptoms                                       | 3                                                                                                                                                                                                                                                                                                                                                                                                                                                                                                                                                                                                                                                                                                                                                                                                                                                                                           |                 |       |                                                                     |   |                                                   |   |                                                       |   |                                                                                      |   |                                            |   |                                                      |   |                   |   |               |   |
| Outpatient status                                                                          | 3                                                                                                                                                                                                                                                                                                                                                                                                                                                                                                                                                                                                                                                                                                                                                                                                                                                                                           |                 |       |                                                                     |   |                                                   |   |                                                       |   |                                                                                      |   |                                            |   |                                                      |   |                   |   |               |   |
| Age <60 years                                                                              | 2                                                                                                                                                                                                                                                                                                                                                                                                                                                                                                                                                                                                                                                                                                                                                                                                                                                                                           |                 |       |                                                                     |   |                                                   |   |                                                       |   |                                                                                      |   |                                            |   |                                                      |   |                   |   |               |   |
| <b>Diabetic foot infection: Pseudomonas risk factors:</b>                                  | <input type="checkbox"/> Residence in a warm climate<br><input type="checkbox"/> High local prevalence<br><input type="checkbox"/> History of pseudomonal infection<br><input type="checkbox"/> Use of carbapenem is indicated Meropenem 1 g Q8h or imipenem/cilastatin 500 mg Q6h (use only when required; extended-spectrum $\beta$ lactamase [ESBL]– producing pathogens expected)                                                                                                                                                                                                                                                                                                                                                                                                                                                                                                       |                 |       |                                                                     |   |                                                   |   |                                                       |   |                                                                                      |   |                                            |   |                                                      |   |                   |   |               |   |
| <b>UTI: Risk factors for MDRO</b>                                                          | <input type="checkbox"/> Residence long-term care facility and presence of invasive devices<br><input type="checkbox"/> Long term catheterization<br><input type="checkbox"/> Broad spectrum antibiotics exposure within the past 90 days<br><input type="checkbox"/> History of MDRO<br><input type="checkbox"/> Recurrent UTI<br><input type="checkbox"/> Nosocomial UTI<br><input type="checkbox"/> History of ESBL producing agents within the past 60 days                                                                                                                                                                                                                                                                                                                                                                                                                             |                 |       |                                                                     |   |                                                   |   |                                                       |   |                                                                                      |   |                                            |   |                                                      |   |                   |   |               |   |
| <b>Colorectal surgery</b>                                                                  | <input type="checkbox"/> Infected with MDR/ESBL<br><input type="checkbox"/> Colonized with MDR/ESBL<br><input type="checkbox"/> Hospitalized for more than 7 days<br><input type="checkbox"/> Multiple hospital admission within the past 3 months<br><input type="checkbox"/> Antibiotic treatment of a systemic infection within the last month                                                                                                                                                                                                                                                                                                                                                                                                                                                                                                                                           |                 |       |                                                                     |   |                                                   |   |                                                       |   |                                                                                      |   |                                            |   |                                                      |   |                   |   |               |   |

**References:**

- IDSA guidelines ( For each indication mentioned above)
- ASHP/ASP Pharmacist guide on the use of antimicrobial
- John Hopkins medicine on the empirical use of antibiotics
- IHS guidelines on the empiric use of antibiotics
- Antimicrobial prophylaxis on HIS
